# Supplementary material
Source: publisher figshare collection journal article supplement (https://gsajournals.figshare.com/ndownloader/files/29052282)
Supplement: Supplementary file 1 [file 29052282]

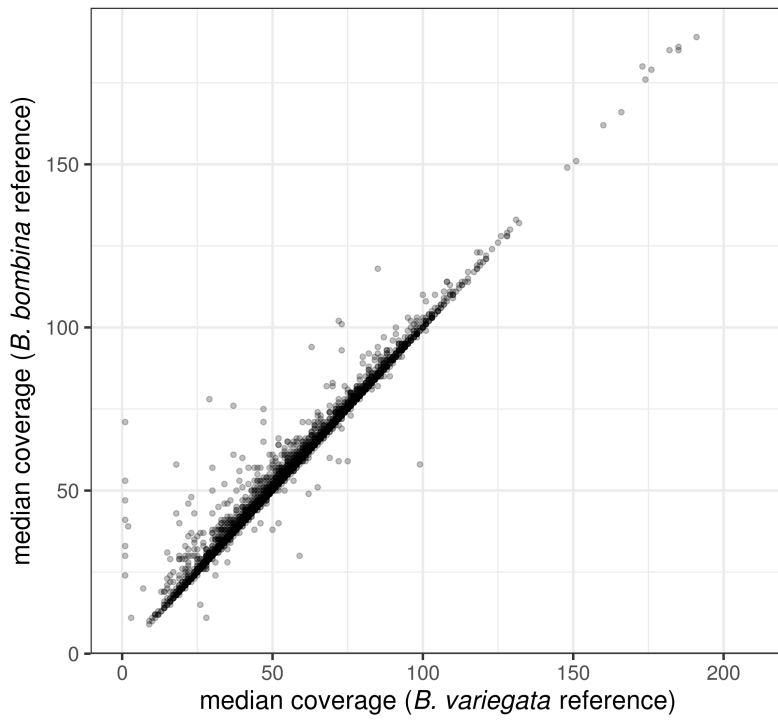

**Figure S5. Mapping bias.** Reads of the F0 *B. bombina* adult (preliminary Miseq analysis, no pooling of samples in the enrichment reaction) were mapped to the separate *B. variegata* and *B. bombina* references. Only those loci assembled by ARC in both taxa are shown ( $n = 3763$ ).
